# Supplementary material for: In situ self-assembly and photopolymerization for hetero-phase synthesis and patterning of conducting materials using soft oxometalates in thermo-optical tweezers
Source: Royal Society of Chemistry journal article supplement (doi:10.1039/c7tc01941f), 2017-01-01
Supplement: c7tc01941f1.pdf [file c7tc01941f1.pdf]

Key to supplementary information videos:

1. Video1.mp4: Growth of a bubble in a SOM + PPy dispersion. The bubble is grown on an existing trail of SOMs with 50 mW input laser power.
2. Video2.mp4: Growth of a bubble in a SOM dispersion. The bubble is grown on an existing trail of SOMs with 50 mW input laser power.
